# Supplementary material for: International surveillance study in acute spinal cord injury confirms viability of multinational clinical trials
Source: PubMed Central journal article supplement (PMC9202190; doi:10.1186/s12916-022-02395-0), 2022-06-14
Supplement: 12916_2022_2395_MOESM3_ESM.pdf [file 12916_2022_2395_MOESM3_ESM.pdf]

### Additional File 3

#### 1. Data source: Sygen® Trial

Sponsored by the United States Food and Drug Administration (FDA)-sponsored, the Sygen trial is a completed randomized, prospective, phase III, placebo controlled, multi-center study testing the efficacy of GM-1 ganglioside therapy in acute, traumatic spinal cord injury. Full design, recruitment, and enrollment details have been published previously.<sup>28</sup> Briefly, patients were required to have at least one lower extremity with a substantial motor deficit to be included in the Sygen trial. Patients with spinal cord transection or penetration were excluded, as were patients with a cauda equina, brachial or lumbosacral plexus, or peripheral nerve injury. Multiple trauma cases were included as long as they were not so severe as to preclude neurologic evaluation. Major head trauma cases and also intubated chest trauma cases were also excluded. With 797 enrolled patients, the Sygen trial was the largest clinical trial ever conducted in the field of spinal cord injury.

Out of 549 patients who were operated on, 515 received surgical decompression, 107 of which within the first 24 hours post injury. Surgical decompression was at the discretion of the treating physician.

The negative finding of the Sygen study is considered Class I Medical Evidence by the spinal cord injury Committee of the American Association of Neurological Surgeons (AANS) and the Congress of Neurological Surgeons (CNS).

#### Data availability

Full anonymized data will be shared at the request from any qualified investigator (please contact the Corresponding Author).

#### Standard Protocol Approvals, Registrations, and Patient Consents

Approval for this study (secondary analysis) was received by an institutional ethical standards committee on human experimentation at the University of British Columbia. The original Sygen clinical trial (results published elsewhere)<sup>2,3</sup> also received ethical approval, but was conducted before clinical trials were required to be registered (i.e., no clinicaltrials.gov identifier available). The data received from the original clinical trial were de-identified in compliance with Health Insurance Portability and Accountability Act (HIPPA).

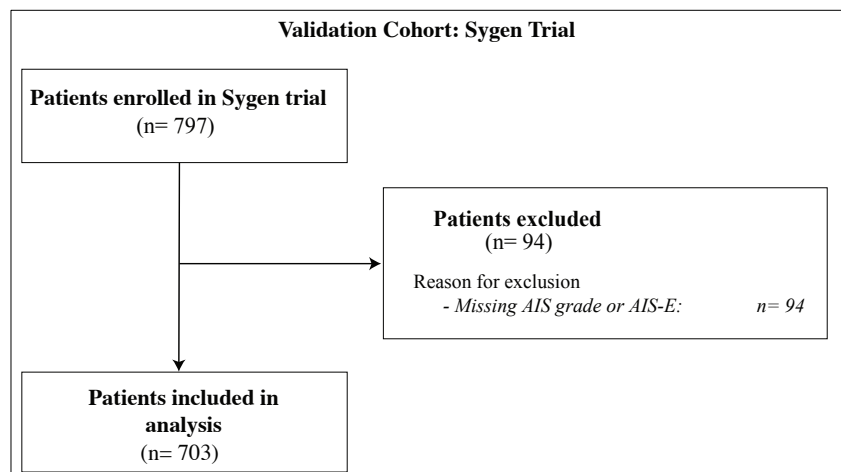

Additional File 3: Figure S1. Flow chart of included and excluded subjects.

## 2. Excluded cohort

A total of 94 patients (mean age at injury,  $31.1 \pm 12.4$  years; 88.3% male) were excluded from our baseline summary analysis (Table A2.1.). The ratio of male and female patients was comparable between included and excluded cohorts (X-squared = 4.402, df = 1, p-value = 0.036). However, in terms of age ( $t = -2.033$ , df = 124.56, p-value = 0.044) the cohorts were different. Specifically, the excluded cohort was slightly younger compared to the included cohort.

**Additional File 3: Table S1. Details on excluded Sygen cohort**

|                                     | Overall<br>(N=94) |
|-------------------------------------|-------------------|
| <b>Sex</b>                          |                   |
| Female                              | 11 (11.7%)        |
| Male                                | 83 (88.3%)        |
| <b>Age (years)</b>                  |                   |
| Mean (SD)                           | 30.1 (12.4)       |
| Median [Min, Max]                   | 28.0 [14.0, 65.0] |
| <b>AIS grade</b>                    |                   |
| A (complete)                        | 0 (0%)            |
| B (sensory incomplete)              | 0 (0%)            |
| C (motor incomplete)                | 0 (0%)            |
| D (motor incomplete)                | 0 (0%)            |
| Missing                             | 94 (100%)         |
| <b>Neurological level of injury</b> |                   |
| Cervical                            | 60 (63.8%)        |
| Thoracic                            | 34 (36.2%)        |

## 3. Missing data

Approximately 7.2% of the data was missing. Variables and number of patients with missing are listed in Table A2.2.

**Additional File 3: Table S2. Outcome variables and number of observations with missing data (Sygen)**

| Variable                    | Count (n) | Proportion [%] |
|-----------------------------|-----------|----------------|
| Lower extremity motor score | 253       | 5.6            |
| Upper extremity motor score | 455       | 9.9            |
| Total motor score           | 532       | 11.8           |
| Total light touch           | 813       | 18.1           |
| Total pin prick             | 813       | 18.1           |
| Benzel Score                | 1381      | 30.7           |

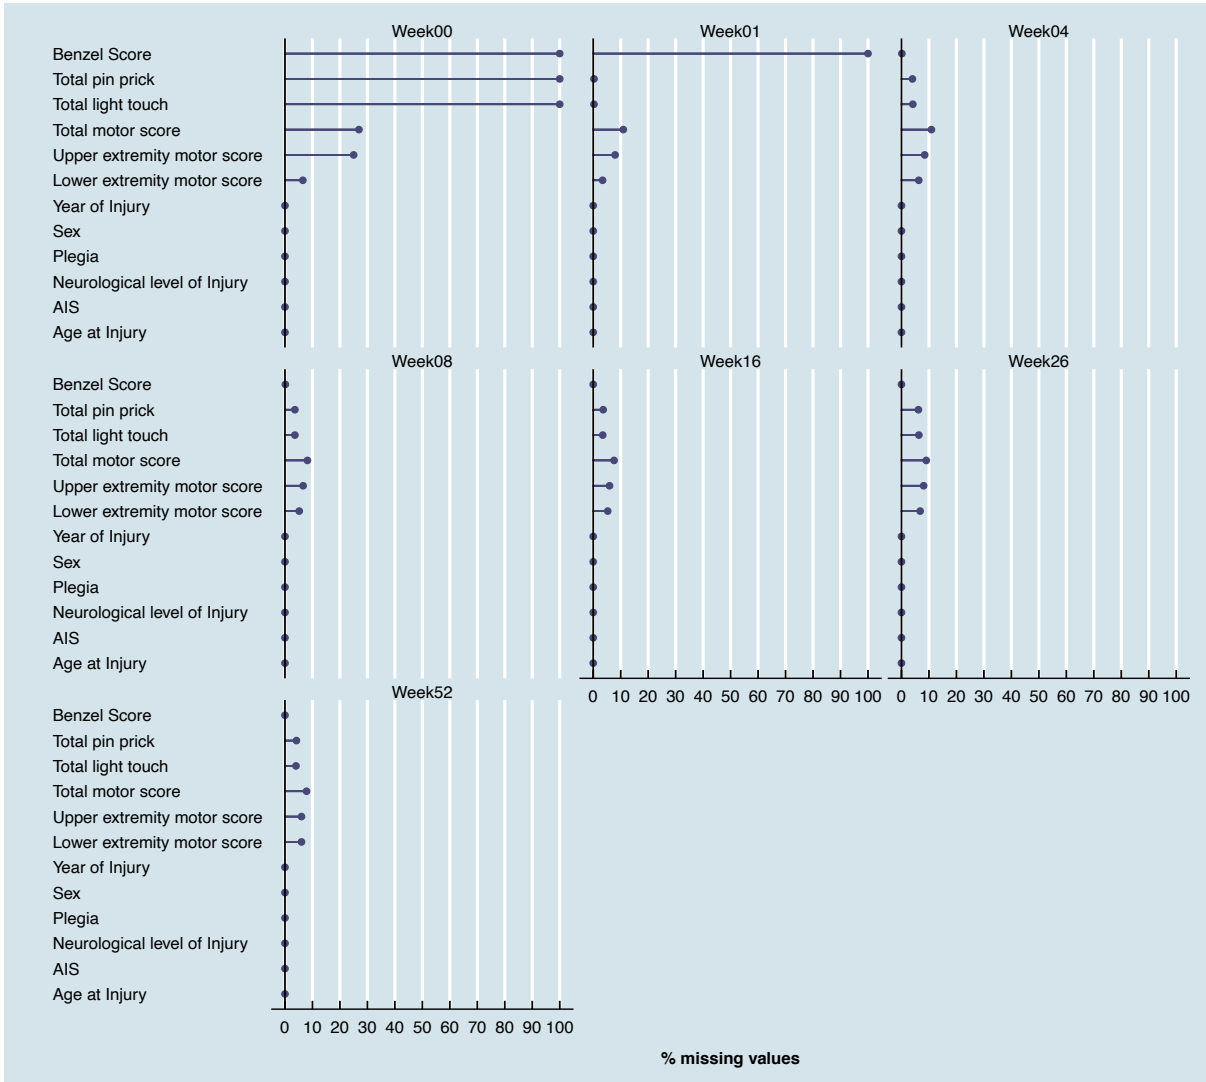

Additional File 3: Figure S2. Proportion of missing data in the Sygen trial stratified by the exam stage.

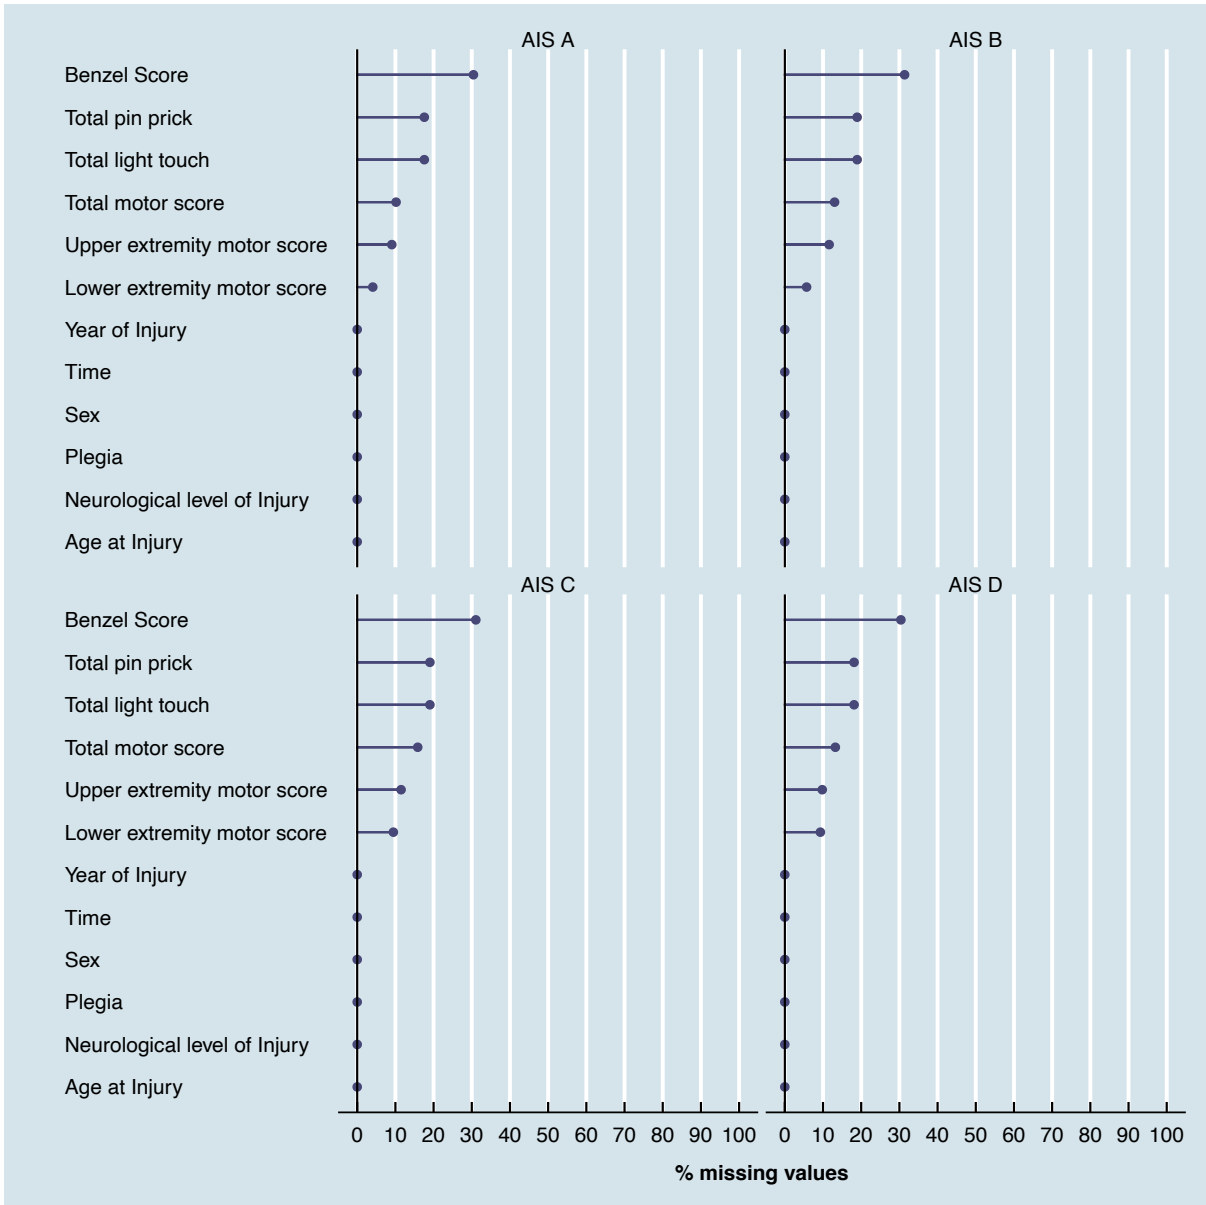

**Additional File 3: Figure S3.** Proportion of missing data in the Sygen trial stratified by the injury severity (i.e., AIS grade).

#### 4. Recovery after Spinal Cord Injury

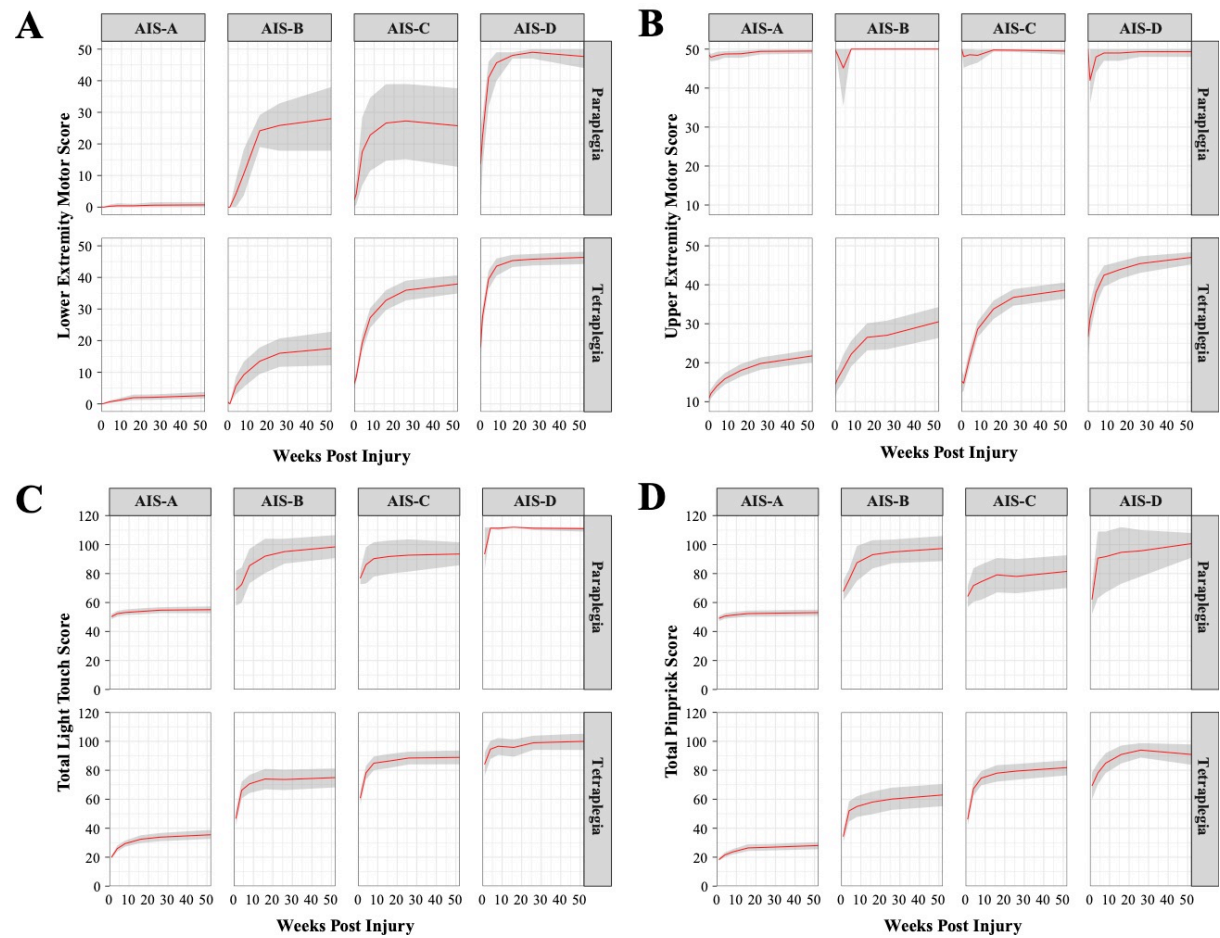

**Additional File 3: Figure S4. Sensorimotor recovery after spinal cord injury in patients enrolled in the Sygen clinical trial.** Recovery of (A) lower and (B) upper extremity motor score as well as (C) total light touch and (D) total pinprick are all dependent on the injury level (tetra- vs. paraplegia) and the injury severity (i.e., AIS grades).

**Additional File 3: Table S3. Model output of longitudinal analysis of demographics (i.e., sex and age) and baseline injury characteristics (i.e., injury severity and level, plegia).**

| Model                         | Coefficients | Estimate   | Std. Error | t-value | p-value | Adjusted p-value |
|-------------------------------|--------------|------------|------------|---------|---------|------------------|
| <b>Age distribution</b>       |              |            |            |         |         |                  |
| Overall                       | Intercept    | 32.687     | 0.928      | 35.210  | <0.001  | Not applicable   |
|                               | YEARDOI      | 0.391      | 1.782      | 0.220   | 0.826   | Not applicable   |
| <b>Overall: Effect of sex</b> |              |            |            |         |         |                  |
| Overall: Effect of sex        | Intercept    | 34.643     | 2.017      | 17.175  | <0.001  | Not applicable   |
|                               | YEARDOI      | -1.523     | 3.955      | -0.385  | 0.700   | Not applicable   |
|                               | Sex          | -2.489     | 2.272      | -1.095  | 0.274   | Not applicable   |
|                               | YEARDOI*Sex  | 2.461      | 4.431      | 0.555   | 0.579   | Not applicable   |
| <b>Paraplegia</b>             |              |            |            |         |         |                  |
| AIS-A                         | Intercept    | 27.986     | 1.686      | 16.602  | <0.001  | <0.001           |
|                               | YEARDOI      | 1.336      | 3.294      | 0.405   | 0.686   |                  |
| AIS-B                         | Intercept    | 34.927     | 7.774      | 4.493   | 0.004   | 0.033            |
|                               | YEARDOI      | -10.104    | 12.781     | -0.791  | 0.459   |                  |
| AIS-C                         | Intercept    | 33.167     | 7.481      | 4.434   | <0.001  | 0.008            |
|                               | YEARDOI      | -2.083     | 12.743     | -0.163  | 0.873   |                  |
| AIS-D                         | Intercept    | 31.333     | 2.494      | 12.561  | 0.051   |                  |
|                               | YEARDOI      | <0.001     | 5.774      | <0.001  | 1.000   |                  |
| <b>Tetraplegia</b>            |              |            |            |         |         |                  |
| AIS-A                         | Intercept    | 32.278     | 1.368      | 23.594  | <0.001  | <0.001           |
|                               | YEARDOI      | 0.812      | 2.552      | 0.318   | 0.751   |                  |
| AIS-B                         | Intercept    | 32.630     | 3.440      | 9.486   | <0.001  | <0.001           |
|                               | YEARDOI      | 3.068      | 6.527      | 0.470   | 0.640   |                  |
| AIS-C                         | Intercept    | 36.843     | 2.350      | 15.681  | <0.001  | <0.001           |
|                               | YEARDOI      | -0.801     | 4.680      | -0.171  | 0.864   |                  |
| AIS-D                         | Intercept    | 35.275     | 4.765      | 7.403   | <0.001  | <0.001           |
|                               | YEARDOI      | 3.186      | 11.911     | 0.267   | 0.791   |                  |
| <b>Sex ratio</b>              |              |            |            |         |         |                  |
| Overall                       | Intercept    | 3.473      | 0.405      | 8.582   | 0.001   |                  |
|                               | YEARDOI      | 1.247      | 0.668      | 1.866   | 0.135   |                  |
| <b>Injury severity</b>        |              |            |            |         |         |                  |
| AIS-A                         | Intercept    | 4.243      | 0.447      | 9.501   | 0.001   | 0.004            |
|                               | YEARDOI      | -0.067     | 0.738      | -0.091  | 0.932   |                  |
| AIS-B                         | Intercept    | 5.120      | 2.632      | 1.946   | 0.124   |                  |
|                               | YEARDOI      | -2.212     | 4.346      | -0.509  | 0.638   |                  |
| AIS-C                         | Intercept    | 4.101      | 2.793      | 1.468   | 0.216   |                  |
|                               | YEARDOI      | -0.444     | 4.612      | -0.096  | 0.928   |                  |
| AIS-D                         | Intercept    | 1.444      | -0.776     | 1.863   | 0.136   |                  |
|                               | YEARDOI      | -7.962e-16 | 1.281      | <0.001  | 1.000   |                  |
| <b>Plegia</b>                 |              |            |            |         |         |                  |
| Paraplegia                    | Intercept    | 5.823      | 0.611      | 9.534   | 0.001   | 0.002            |
|                               | YEARDOI      | -3.951     | 1.009      | -3.917  | 0.017   |                  |
| Tetraplegia                   | Intercept    | 2.430      | 1.170      | 2.078   | 0.106   |                  |
|                               | YEARDOI      | 4.565      | 1.932      | 2.363   | 0.077   |                  |
| <b>AIS grade</b>              |              |            |            |         |         |                  |
| <b>Overall</b>                |              |            |            |         |         |                  |
| AIS-A                         | Intercept    | 28.945     | 12.121     | 2.388   | 0.038   | 0.152            |
|                               | YEARDOI      | 9.833      | 20.017     | 0.491   | 0.634   |                  |
| AIS-B                         | Intercept    | 4.390      | 1.938      | 2.266   | 0.053   |                  |
|                               | YEARDOI      | 2.891      | 3.955      | 0.731   | 0.486   |                  |
| AIS-C                         | Intercept    | 11.040     | 3.682      | 2.999   | 0.015   | 0.060            |
|                               | YEARDOI      | -1.156     | 6.622      | -0.175  | 0.865   |                  |
| AIS-D                         | Intercept    | 3.363      | 1.351      | 2.490   | 0.042   | 0.168            |
|                               | YEARDOI      | 2.148      | 2.707      | -0.794  | 0.454   |                  |
| <b>Paraplegia</b>             |              |            |            |         |         |                  |
| AIS-A                         | Intercept    | 19.152     | 2.825      | 6.778   | 0.002   | 0.020            |
|                               | YEARDOI      | -2.034     | 4.666      | -0.436  | 0.685   |                  |
| AIS-B                         | Intercept    | 1.188      | 0.886      | 1.341   | 0.312   |                  |
|                               | YEARDOI      | 0.642      | 1.738      | 0.369   | 0.747   |                  |
| AIS-C                         | Intercept    | 0.914      | 0.482      | 1.894   | 0.154   |                  |
|                               | YEARDOI      | 2.281      | 0.984      | 2.318   | 0.103   |                  |
| AIS-D                         | Intercept    | 0.609      | 0.138      | 4.400   | 0.142   |                  |
|                               | YEARDOI      | 0.246      | 0.320      | 0.767   | 0.583   |                  |
| <b>Tetraplegia</b>            |              |            |            |         |         |                  |
| AIS-A                         | Intercept    | 38.739     | 8.262      | 4.689   | 0.009   | 0.075            |
|                               | YEARDOI      | 21.700     | 13.644     | 1.590   | 0.187   |                  |
| AIS-B                         | Intercept    | 7.881      | 1.953      | 4.035   | 0.027   | 0.219            |
|                               | YEARDOI      | 5.141      | 3.987      | 1.289   | 0.288   |                  |
| AIS-C                         | Intercept    | 22.439     | 2.994      | 7.496   | 0.002   | 0.014            |
|                               | YEARDOI      | -9.371     | 4.944      | -1.895  | 0.131   |                  |
| AIS-D                         | Intercept    | 5.821      | 1.873      | 3.108   | 0.053   |                  |
|                               | YEARDOI      | -4.346     | 3.823      | -1.137  | 0.338   |                  |

**Additional File 3: Table S4. Model output of lower extremity motor score (LEMS) stratified by sex, plegia, and AIS grades.** Patients were enrolled in the Sygen Trial. Note: In case the number of patients per group were too low (n<3), the model did not converge and thus, the results are not represented in the table.

| Model                              | Variable                          | Estimate      | Standard Error | DF              | t-value       |
|------------------------------------|-----------------------------------|---------------|----------------|-----------------|---------------|
| <b>Female paraplegic patients</b>  |                                   |               |                |                 |               |
| AIS-A (n = 27)                     | Intercept                         | 0.901         | 2.907          | 29.275          | 0.307         |
|                                    | Age                               | -2.199        | 5.466          | 24.316          | -0.402        |
|                                    | Time since Injury                 | -2.254        | 1.810          | 148.156         | -1.245        |
|                                    | YEARDOI                           | -0.714        | 3.909          | 34.504          | -0.183        |
|                                    | <b>Time since Injury *YEARDOI</b> | <b>10.216</b> | <b>3.207</b>   | <b>146.613</b>  | <b>3.187</b>  |
| <b>Female tetraplegic patients</b> |                                   |               |                |                 |               |
| AIS-A (n = 60)                     | Intercept                         | 0.238         | 1.433          | 69.984          | 0.166         |
|                                    | Age                               | -0.205        | 2.269          | 59.472          | -0.090        |
|                                    | Time since Injury                 | 0.131         | 0.907          | 311.296         | 0.144         |
|                                    | YEARDOI                           | -0.416        | 1.985          | 82.687          | -0.209        |
|                                    | <b>Time since Injury *YEARDOI</b> | <b>5.438</b>  | <b>1.726</b>   | <b>311.802</b>  | <b>3.151</b>  |
| AIS-B (n = 19)                     | Intercept                         | 0.965         | 7.580          | 21.387          | 0.127         |
|                                    | Age                               | -8.940        | 12.860         | 15.825          | -0.695        |
|                                    | Time since Injury                 | <b>29.204</b> | <b>6.122</b>   | <b>90.729</b>   | <b>4.702</b>  |
|                                    | YEARDOI                           | 4.047         | 13.731         | 24.221          | 0.294         |
| AIS-C (n = 29)                     | Time since Injury *YEARDOI        | -19.115       | 13.246         | 92.121          | -1.442        |
|                                    | Intercept                         | 14.007        | 4.523          | 34.612          | 3.091         |
|                                    | Age                               | -15.064       | 7.270          | 25.632          | -2.051        |
|                                    | Time since Injury                 | <b>39.202</b> | <b>3.275</b>   | <b>152.639</b>  | <b>11.967</b> |
| AIS-D (n = 5)                      | YEARDOI                           | 1.994         | 7.750          | 43.472          | 0.256         |
|                                    | Time since Injury *YEARDOI        | -1.856        | 7.396          | 152.002         | -0.251        |
|                                    | Intercept                         | 36.167        | 6.151          | 2.393           | 5.886         |
|                                    | Age                               | -6.810        | 9.589          | 1.928           | -0.709        |
|                                    | <b>Time since Injury</b>          | <b>15.259</b> | <b>4.126</b>   | <b>23.156</b>   | <b>3.669</b>  |
|                                    | YEARDOI                           | -21.498       | 10.225         | 3.349           | -2.102        |
|                                    | Time since Injury *YEARDOI        | 16.120        | 10.307         | 22.444          | 1.564         |
| <b>Male paraplegic patients</b>    |                                   |               |                |                 |               |
| AIS-A (n = 105)                    | Intercept                         | 0.072         | 0.184          | 228.119         | 0.391         |
|                                    | Age                               | -0.440        | 0.348          | 104.760         | -1.229        |
|                                    | Time since Injury                 | 0.589         | 0.216          | 588.869         | 2.721         |
|                                    | YEARDOI                           | 0.180         | 0.313          | 329.759         | 0.573         |
| AIS-B (n = 8)                      | Time since Injury *YEARDOI        | -0.935        | 0.437          | 591.001         | -2.119        |
|                                    | Intercept                         | 0.484         | 6.698          | 7.056           | 0.072         |
|                                    | Age                               | -6.352        | 11.822         | 5.263           | -0.537        |
|                                    | Time since Injury                 | <b>36.242</b> | <b>5.304</b>   | <b>39.484</b>   | <b>6.811</b>  |
| AIS-C (n = 12)                     | YEARDOI                           | -3.521        | 7.968          | 10.425          | -0.441        |
|                                    | Time since Injury *YEARDOI        | -7.957        | 9.354          | 40.897          | -0.854        |
|                                    | Intercept                         | 13.577        | 14.071         | 10.411          | 0.960         |
|                                    | Age                               | -19.713       | 23.657         | 8.896           | -0.833        |
| AIS-D (n = 12)                     | Time since Injury                 | 20.800        | 7.468          | 56.846          | 2.779         |
|                                    | YEARDOI                           | -2.848        | 19.099         | 11.259          | -0.147        |
|                                    | Time since Injury *YEARDOI        | 1.054         | 12.635         | 56.467          | 0.083         |
|                                    |                                   |               |                |                 |               |
| <b>Male tetraplegic patients</b>   |                                   |               |                |                 |               |
| AIS-A (n = 252)                    | Intercept                         | -0.265        | 0.668          | 327.091         | -0.397        |
|                                    | Age                               | 0.795         | 1.175          | 255.894         | 0.676         |
|                                    | Time since Injury                 | <b>3.291</b>  | <b>0.496</b>   | <b>1319.769</b> | <b>6.639</b>  |
|                                    | YEARDOI                           | -0.495        | 0.986          | 376.979         | -0.503        |
| AIS-B (n = 50)                     | Time since Injury *YEARDOI        | -0.939        | 0.909          | 1313.800        | -1.032        |
|                                    | Intercept                         | 1.967         | 3.892          | 64.663          | 0.505         |
|                                    | Age                               | -9.116        | 5.676          | 47.961          | -1.610        |
|                                    | Time since Injury                 | <b>14.025</b> | <b>3.178</b>   | <b>262.989</b>  | <b>4.414</b>  |
| AIS-C (n = 105)                    | YEARDOI                           | 1.606         | 5.830          | 75.189          | 0.272         |
|                                    | Time since Injury *YEARDOI        | 10.241        | 5.839          | 262.320         | 1.730         |
|                                    | Intercept                         | 5.260         | 3.242          | 123.603         | 1.626         |
|                                    | Age                               | 3.342         | 4.670          | 102.870         | 0.713         |
| AIS-D (n = 23)                     | Time since Injury                 | <b>34.210</b> | <b>2.142</b>   | <b>496.111</b>  | <b>15.971</b> |
|                                    | YEARDOI                           | -0.870        | 4.773          | 140.481         | -0.183        |
|                                    | Time since Injury *YEARDOI        | -1.899        | 4.140          | 497.445         | -0.458        |
|                                    | Intercept                         | <b>24.613</b> | <b>4.266</b>   | <b>29.369</b>   | <b>5.739</b>  |
| AIS-D (n = 23)                     | Age                               | 0.677         | 6.459          | 18.880          | 0.105         |
|                                    | Time since Injury                 | <b>28.263</b> | <b>3.845</b>   | <b>113.833</b>  | <b>7.353</b>  |
|                                    | YEARDOI                           | -3.825        | 8.499          | 37.084          | -0.450        |
|                                    | Time since Injury *YEARDOI        | 1.157         | 10.291         | 118.595         | 0.113         |

**Additional File 3: Table S5.** Model output of upper extremity motor score (UEMS) stratified by sex and AIS grades. Patients were enrolled in the Sygen Trial. Note: conducted for the tetraplegic patients.

| Model                              | Variable                   | Estimate | Standard Error | DF       | t-value | p-value |
|------------------------------------|----------------------------|----------|----------------|----------|---------|---------|
| <b>Female tetraplegic patients</b> |                            |          |                |          |         |         |
| AIS-A (n = 59)                     | Intercept                  | 16.815   | 4.142          | 57.624   | 4.059   | <0.001  |
|                                    | Age                        | -5.101   | 6.833          | 56.324   | -0.747  | 0.459   |
|                                    | Time since Injury          | 9.156    | 0.945          | 288.125  | 9.689   | <0.001  |
|                                    | YEARDOI                    | -3.363   | 5.610          | 58.761   | -0.599  | 0.551   |
|                                    | Time since Injury *YEARDOI | -1.438   | 1.769          | 288.106  | -0.813  | 0.417   |
| AIS-B (n = 19)                     | Intercept                  | 21.414   | 6.684          | 18.457   | 3.204   | 0.005   |
|                                    | Age                        | -11.019  | 11.705         | 15.442   | -0.941  | 0.361   |
|                                    | Time                       | 5.825    | 3.927          | 81.377   | 1.484   | 0.142   |
|                                    | YEARDOI                    | -10.163  | 11.943         | 19.865   | -0.851  | 0.405   |
|                                    | Time since Injury *YEARDOI | 27.328   | 8.551          | 82.510   | 3.196   | 0.002   |
| AIS-C (n = 29)                     | Intercept                  | 17.130   | 3.698          | 33.835   | 4.632   | <0.001  |
|                                    | Age                        | -11.935  | 6.010          | 26.211   | -1.986  | 0.058   |
|                                    | Time since Injury          | 29.186   | 2.549          | 141.350  | 11.451  | <0.001  |
|                                    | YEARDOI                    | 3.083    | 6.317          | 41.871   | 0.488   | 0.628   |
|                                    | Time since Injury *YEARDOI | -1.297   | 5.788          | 140.900  | -0.224  | 0.823   |
| AIS-D (n = 5)                      | Intercept                  | 29.421   | 8.268          | 1.888    | 3.558   | 0.077   |
|                                    | Age                        | -13.460  | 13.459         | 1.802    | -1.000  | 0.432   |
|                                    | Time since Injury          | 28.951   | 2.605          | 22.194   | 11.113  | <0.001  |
|                                    | YEARDOI                    | 2.094    | 13.005         | 2.142    | 0.161   | 0.886   |
|                                    | Time since Injury *YEARDOI | -25.083  | 6.769          | 21.921   | -3.706  | 0.001   |
| <b>Male tetraplegic patients</b>   |                            |          |                |          |         |         |
| AIS-A (n = 253)                    | Intercept                  | 15.919   | 1.707          | 266.949  | 9.327   | <0.001  |
|                                    | Age                        | -9.102   | 3.108          | 251.783  | -2.928  | 0.004   |
|                                    | Time since Injury          | 9.069    | 0.636          | 1219.227 | 14.254  | <0.001  |
|                                    | YEARDOI                    | -4.248   | 2.445          | 277.576  | -1.737  | 0.084   |
|                                    | Time since Injury *YEARDOI | 2.141    | 1.164          | 1217.206 | 1.840   | 0.066   |
| AIS-B (n = 49)                     | Intercept                  | 26.170   | 4.605          | 51.885   | 5.684   | <0.001  |
|                                    | Age                        | -11.705  | 6.989          | 45.445   | -1.675  | 0.101   |
|                                    | Time since Injury          | 12.430   | 2.338          | 237.283  | 5.316   | <0.001  |
|                                    | YEARDOI                    | -13.324  | 6.786          | 54.239   | -1.963  | 0.055   |
|                                    | Time since Injury *YEARDOI | 6.276    | 4.242          | 236.605  | 1.479   | 0.140   |
| AIS-C (n = 107)                    | Intercept                  | 17.164   | 2.899          | 122.063  | 5.921   | <0.001  |
|                                    | Age                        | -8.161   | 4.126          | 101.429  | -1.978  | 0.051   |
|                                    | Time since Injury          | 26.474   | 1.761          | 489.094  | 15.032  | <0.001  |
|                                    | YEARDOI                    | 0.104    | 4.169          | 133.218  | 0.025   | 0.980   |
|                                    | Time since Injury *YEARDOI | -0.018   | 3.313          | 488.768  | -0.005  | 0.996   |
| AIS-D (n = 23)                     | Intercept                  | 32.743   | 3.568          | 31.816   | 9.177   | <0.001  |
|                                    | Age                        | -5.715   | 5.412          | 20.562   | -1.056  | 0.303   |
|                                    | Time since Injury          | 23.041   | 3.174          | 114.173  | 7.259   | <0.001  |
|                                    | YEARDOI                    | 3.351    | 7.353          | 43.452   | 0.456   | 0.651   |
|                                    | Time since Injury *YEARDOI | -12.778  | 8.581          | 116.395  | -1.489  | 0.139   |

**Additional File 3: Table S6.** Model output of total motor score (TMS) stratified by sex, plegia, and AIS grades. Patients were enrolled in the Sygen Trial. Note: In some cases where too low (n<3), the model did not converge and thus, the results are not represented in the table.

| Model                              | Variable                   | Estimate | Standard Error | DF      | t-value |
|------------------------------------|----------------------------|----------|----------------|---------|---------|
| <b>Female paraplegic patients</b>  |                            |          |                |         |         |
| AIS-A (n = 27)                     | Intercept                  | 50.522   | 3.903          | 32.757  | 12.946  |
|                                    | Age                        | -12.735  | 7.091          | 23.762  | -1.796  |
|                                    | Time since Injury          | -0.324   | 3.179          | 152.560 | -0.102  |
|                                    | YEARDOI                    | -4.456   | 5.392          | 42.639  | -0.827  |
|                                    | Time since Injury *YEARDOI | 17.799   | 5.614          | 150.401 | 3.171   |
| <b>Female tetraplegic patients</b> |                            |          |                |         |         |
| AIS-A (n = 60)                     | Intercept                  | 15.816   | 4.624          | 59.999  | 3.420   |
|                                    | Age                        | -5.433   | 7.551          | 57.769  | -0.719  |
|                                    | Time since Injury          | 10.400   | 1.483          | 309.018 | 7.015   |
|                                    | YEARDOI                    | -3.177   | 6.203          | 62.590  | -0.512  |
|                                    | Time since Injury *YEARDOI | 4.323    | 2.803          | 309.054 | 1.542   |
| AIS-B (n = 19)                     | Intercept                  | 20.383   | 12.184         | 20.289  | 1.673   |
|                                    | Age                        | -20.149  | 20.923         | 15.722  | -0.963  |
|                                    | Time since Injury          | 37.775   | 9.090          | 92.224  | 4.156   |



|                                  |                            |         |        |          |        |
|----------------------------------|----------------------------|---------|--------|----------|--------|
|                                  | YEARDOI                    | -3.694  | 21.948 | 22.517   | -0.168 |
|                                  | Time since Injury *YEARDOI | 5.402   | 19.651 | 93.493   | 0.275  |
| AIS-C (n = 29)                   | Intercept                  | 30.834  | 7.746  | 32.130   | 3.981  |
|                                  | Age                        | -27.160 | 12.723 | 25.909   | -2.135 |
|                                  | Time since Injury          | 68.551  | 4.938  | 157.108  | 13.881 |
|                                  | YEARDOI                    | 5.959   | 13.013 | 37.542   | 0.458  |
|                                  | Time since Injury *YEARDOI | -3.931  | 10.967 | 156.459  | -0.358 |
| AIS-D (n = 5)                    | Intercept                  | 65.348  | 12.034 | 1.990    | 5.431  |
|                                  | Age                        | -20.168 | 19.398 | 1.827    | -1.040 |
|                                  | Time since Injury          | 44.142  | 5.164  | 23.533   | 8.548  |
|                                  | YEARDOI                    | -17.381 | 19.026 | 2.304    | -0.914 |
|                                  | Time since Injury *YEARDOI | -10.714 | 12.619 | 23.065   | -0.849 |
| <b>Male paraplegic patients</b>  |                            |         |        |          |        |
| AIS-A (n = 105)                  | Intercept                  | 42.123  | 1.546  | 168.440  | 27.240 |
|                                  | Age                        | -7.039  | 3.151  | 97.833   | -2.234 |
|                                  | Time since Injury          | 10.549  | 1.557  | 585.166  | 6.776  |
|                                  | YEARDOI                    | 8.230   | 2.548  | 227.901  | 3.230  |
|                                  | Time since Injury *YEARDOI | -8.344  | 3.135  | 587.670  | -2.662 |
| AIS-B (n = 8)                    | Intercept                  | 48.248  | 8.454  | 6.770    | 5.707  |
|                                  | Age                        | -3.381  | 15.043 | 5.226    | -0.225 |
|                                  | Time since Injury          | 37.189  | 6.274  | 40.368   | 5.928  |
|                                  | YEARDOI                    | -4.749  | 9.855  | 9.275    | -0.482 |
|                                  | Time since Injury *YEARDOI | -5.640  | 10.817 | 41.381   | -0.521 |
| AIS-C (n = 12)                   | Intercept                  | 40.851  | 16.389 | 9.994    | 2.493  |
|                                  | Age                        | -13.856 | 27.816 | 8.863    | -0.498 |
|                                  | Time since Injury          | 41.215  | 7.812  | 58.487   | 5.276  |
|                                  | YEARDOI                    | 26.051  | 22.194 | 10.714   | 1.174  |
|                                  | Time since Injury *YEARDOI | -28.946 | 13.412 | 58.235   | -2.158 |
| <b>Male tetraplegic patients</b> |                            |         |        |          |        |
| AIS-A (n = 254)                  | Intercept                  | 14.559  | 1.858  | 287.003  | 7.835  |
|                                  | Age                        | -8.206  | 3.333  | 254.628  | -2.462 |
|                                  | Time since Injury          | 14.028  | 1.004  | 1332.975 | 13.971 |
|                                  | YEARDOI                    | -4.082  | 2.685  | 310.454  | -1.520 |
|                                  | Time since Injury *YEARDOI | 0.112   | 1.846  | 1328.793 | 0.060  |
| AIS-B (n = 50)                   | Intercept                  | 26.600  | 6.732  | 57.284   | 3.952  |
|                                  | Age                        | -20.177 | 10.087 | 47.157   | -2.000 |
|                                  | Time since Injury          | 27.541  | 4.478  | 267.594  | 6.150  |
|                                  | YEARDOI                    | -8.994  | 9.972  | 64.025   | -0.902 |
|                                  | Time since Injury *YEARDOI | 15.552  | 8.250  | 267.199  | 1.885  |
| AIS-C (n = 107)                  | Intercept                  | 21.567  | 4.852  | 123.642  | 4.445  |
|                                  | Age                        | -4.350  | 6.954  | 105.218  | -0.626 |
|                                  | Time since Injury          | 61.987  | 3.194  | 547.798  | 19.411 |
|                                  | YEARDOI                    | 0.798   | 7.084  | 142.720  | 0.113  |
|                                  | Time since Injury *YEARDOI | -6.174  | 6.210  | 549.234  | -0.994 |
| AIS-D (n = 23)                   | Intercept                  | 51.807  | 5.046  | 39.359   | 10.268 |
|                                  | Age                        | -1.874  | 7.137  | 19.462   | -0.263 |
|                                  | Time since Injury          | 56.922  | 5.992  | 127.212  | 9.499  |
|                                  | YEARDOI                    | 0.829   | 10.616 | 58.551   | 0.078  |
|                                  | Time since Injury *YEARDOI | -13.880 | 15.998 | 132.336  | -0.868 |

**Additional File 3: Table S7.** Model output of total light touch (TLT) stratified by sex, plegia, and AIS grades. Patients were enrolled in the Sygen Trial. Note: In ca patients per group were too low (n<3), the model did not converge and thus, the results are not represented in the table.

| Model                              | Variable                  | Estimate      | Standard Error | DF              | t-value       | p-value          |
|------------------------------------|---------------------------|---------------|----------------|-----------------|---------------|------------------|
| <b>Female paraplegic patients</b>  |                           |               |                |                 |               |                  |
| AIS-A (n = 27)                     | <b>Intercept</b>          | <b>54·821</b> | <b>7·379</b>   | <b>32·854</b>   | <b>7·430</b>  | <b>&lt;0·001</b> |
|                                    | Age                       | -9·757        | 13·432         | 24·046          | -0·726        | 0·475            |
|                                    | Time since Injury         | -3·477        | 5·047          | 124·711         | -0·689        | 0·492            |
|                                    | YEARDOI                   | -4·980        | 10·131         | 41·627          | -0·492        | 0·626            |
|                                    | Time since Injury*YEARDOI | 20·663        | 8·829          | 123·405         | 2·340         | 0·021            |
| <b>Female tetraplegic patients</b> |                           |               |                |                 |               |                  |
| AIS-A (n = 60)                     | <b>Intercept</b>          | <b>27·500</b> | <b>6·529</b>   | <b>76·261</b>   | <b>4·212</b>  | <b>&lt;0·001</b> |
|                                    | Age                       | -9·754        | 10·176         | 60·814          | -0·959        | 0·342            |
|                                    | <b>Time since Injury</b>  | <b>14·408</b> | <b>4·136</b>   | <b>257·206</b>  | <b>3·483</b>  | <b>0·001</b>     |
|                                    | YEARDOI                   | -4·738        | 9·142          | 93·689          | -0·518        | 0·606            |
|                                    | Time since Injury*YEARDOI | 10·552        | 7·763          | 257·129         | 1·359         | 0·175            |
| AIS-B (n = 19)                     | <b>Intercept</b>          | <b>52·190</b> | <b>18·949</b>  | <b>23·152</b>   | <b>2·754</b>  | <b>0·011</b>     |
|                                    | Age                       | 3·962         | 31·254         | 15·372          | 0·127         | 0·901            |
|                                    | Time since Injury         | 37·130        | 14·728         | 72·855          | 2·521         | 0·014            |
|                                    | YEARDOI                   | -9·167        | 34·702         | 27·185          | -0·264        | 0·794            |
|                                    | Time since Injury*YEARDOI | -1·311        | 31·806         | 73·866          | -0·041        | 0·967            |
| AIS-C (n = 29)                     | <b>Intercept</b>          | <b>72·609</b> | <b>9·978</b>   | <b>37·281</b>   | <b>7·277</b>  | <b>&lt;0·001</b> |
|                                    | Age                       | -24·226       | 15·856         | 26·564          | -1·528        | 0·138            |
|                                    | <b>Time since Injury</b>  | <b>37·819</b> | <b>6·824</b>   | <b>131·733</b>  | <b>5·542</b>  | <b>&lt;0·001</b> |
|                                    | YEARDOI                   | 4·531         | 17·066         | 46·458          | 0·266         | 0·792            |
|                                    | Time since Injury*YEARDOI | -12·737       | 15·197         | 131·451         | -0·838        | 0·404            |
| AIS-D (n = 5)                      | <b>Intercept</b>          | <b>90·760</b> | <b>19·897</b>  | <b>1·587</b>    | <b>4·561</b>  | <b>0·068</b>     |
|                                    | Age                       | -25·550       | 31·244         | 1·306           | -0·818        | 0·536            |
|                                    | Time since Injury         | 27·839        | 10·545         | 18·209          | 2·640         | 0·017            |
|                                    | YEARDOI                   | 11·536        | 32·590         | 2·126           | 0·354         | 0·755            |
|                                    | Time since Injury*YEARDOI | -5·600        | 25·787         | 17·620          | -0·217        | 0·831            |
| <b>Male paraplegic patients</b>    |                           |               |                |                 |               |                  |
| AIS-A (n = 105)                    | <b>Intercept</b>          | <b>54·562</b> | <b>2·241</b>   | <b>126·802</b>  | <b>24·346</b> | <b>&lt;0·001</b> |
|                                    | Age                       | -13·804       | 4·960          | 101·649         | -2·783        | 0·006            |
|                                    | <b>Time since Injury</b>  | <b>6·389</b>  | <b>1·281</b>   | <b>477·683</b>  | <b>4·987</b>  | <b>&lt;0·001</b> |
|                                    | YEARDOI                   | -0·416        | 3·532          | 147·043         | -0·118        | 0·906            |
|                                    | Time since Injury*YEARDOI | -3·996        | 2·596          | 478·723         | -1·540        | 0·124            |
| AIS-B (n = 8)                      | <b>Intercept</b>          | <b>66·384</b> | <b>14·911</b>  | <b>7·413</b>    | <b>4·452</b>  | <b>0·003</b>     |
|                                    | Age                       | 14·177        | 25·991         | 5·283           | 0·546         | 0·608            |
|                                    | Time since Injury         | 19·674        | 10·651         | 32·516          | 1·847         | 0·074            |
|                                    | YEARDOI                   | -16·635       | 17·849         | 11·058          | -0·932        | 0·371            |
|                                    | Time since Injury*YEARDOI | 41·548        | 18·370         | 33·192          | 2·262         | 0·030            |
| AIS-C (n = 12)                     | <b>Intercept</b>          | <b>83·657</b> | <b>14·242</b>  | <b>11·145</b>   | <b>5·874</b>  | <b>&lt;0·001</b> |
|                                    | Age                       | -17·442       | 23·576         | 8·978           | -0·740        | 0·478            |
|                                    | Time since Injury         | 18·302        | 7·277          | 45·598          | 2·515         | 0·016            |
|                                    | YEARDOI                   | -3·194        | 19·514         | 12·476          | -0·164        | 0·873            |
|                                    | Time since Injury*YEARDOI | -2·663        | 12·621         | 45·405          | -0·211        | 0·834            |
| <b>Male tetraplegic patients</b>   |                           |               |                |                 |               |                  |
| AIS-A (n = 254)                    | <b>Intercept</b>          | <b>21·099</b> | <b>2·636</b>   | <b>355·562</b>  | <b>8·005</b>  | <b>&lt;0·001</b> |
|                                    | Age                       | -9·759        | 4·503          | 260·122         | -2·167        | 0·031            |
|                                    | <b>Time since Injury</b>  | <b>19·352</b> | <b>1·904</b>   | <b>1092·265</b> | <b>10·165</b> | <b>&lt;0·001</b> |
|                                    | YEARDOI                   | 1·701         | 3·925          | 428·791         | 0·434         | 0·665            |
|                                    | Time since Injury*YEARDOI | -4·173        | 3·519          | 1087·972        | -1·186        | 0·236            |
| AIS-B (n = 50)                     | <b>Intercept</b>          | <b>71·180</b> | <b>8·134</b>   | <b>91·543</b>   | <b>8·751</b>  | <b>&lt;0·001</b> |
|                                    | Age                       | -16·140       | 10·652         | 45·583          | -1·515        | 0·137            |
|                                    | Time since Injury         | 15·072        | 8·080          | 219·397         | 1·865         | 0·064            |
|                                    | YEARDOI                   | -33·202       | 12·738         | 121·081         | -2·607        | 0·010            |
|                                    | Time since Injury*YEARDOI | 30·180        | 14·737         | 218·895         | 2·048         | 0·042            |
| AIS-C (n = 106)                    | <b>Intercept</b>          | <b>61·737</b> | <b>6·354</b>   | <b>149·939</b>  | <b>9·716</b>  | <b>&lt;0·001</b> |
|                                    | Age                       | -1·373        | 8·696          | 105·611         | -0·158        | 0·875            |
|                                    | <b>Time since Injury</b>  | <b>34·289</b> | <b>4·986</b>   | <b>442·729</b>  | <b>6·878</b>  | <b>&lt;0·001</b> |
|                                    | YEARDOI                   | 5·309         | 9·611          | 195·733         | 0·552         | 0·581            |
|                                    | Time since Injury*YEARDOI | -7·830        | 9·708          | 443·544         | -0·807        | 0·420            |
| AIS-D (n = 23)                     | <b>Intercept</b>          | <b>91·861</b> | <b>8·288</b>   | <b>36·208</b>   | <b>11·084</b> | <b>&lt;0·001</b> |
|                                    | Age                       | 2·663         | 12·123         | 20·559          | 0·220         | 0·828            |
|                                    | Time since Injury         | 12·842        | 7·664          | 102·672         | 1·676         | 0·097            |
|                                    | YEARDOI                   | -18·959       | 17·315         | 52·144          | -1·095        | 0·279            |
|                                    | Time since Injury*YEARDOI | 6·487         | 20·702         | 105·428         | 0·313         | 0·755            |

**Additional File 3: Table S8.** Model output of total pinprick (TPP) stratified by sex, plegia, and AIS grades. Patients were enrolled in the Sygen Trial. Note: In case per group were too low (n<3), the model did not converge and thus, the results are not represented in the table.

| Model                              | Variable                  | Estimate      | Standard Error | DF              | t-value       | p-value          |
|------------------------------------|---------------------------|---------------|----------------|-----------------|---------------|------------------|
| <b>Female paraplegic patients</b>  |                           |               |                |                 |               |                  |
| AIS-A (n = 27)                     | <b>Intercept</b>          | <b>51·630</b> | <b>7·268</b>   | <b>31·242</b>   | <b>7·103</b>  | <b>&lt;0·001</b> |
|                                    | Age                       | -7·966        | 13·398         | 24·008          | -0·595        | 0·558            |
|                                    | Time since Injury         | 1·130         | 4·596          | 124·303         | 0·246         | 0·806            |
|                                    | YEARDOI                   | -2·103        | 9·892          | 38·410          | -0·213        | 0·833            |
|                                    | Time since Injury*YEARDOI | 10·567        | 8·036          | 123·114         | 1·315         | 0·191            |
| <b>Female tetraplegic patients</b> |                           |               |                |                 |               |                  |
| AIS-A (n = 60)                     | <b>Intercept</b>          | <b>22·429</b> | <b>4·627</b>   | <b>79·558</b>   | <b>4·848</b>  | <b>&lt;0·001</b> |
|                                    | Age                       | -3·808        | 7·141          | 61·005          | -0·533        | 0·596            |
|                                    | Time since Injury         | 4·648         | 3·148          | 257·763         | 1·476         | 0·141            |
|                                    | YEARDOI                   | -3·581        | 6·531          | 100·606         | -0·548        | 0·585            |
|                                    | Time since Injury*YEARDOI | 12·692        | 5·909          | 257·690         | 2·148         | 0·033            |
| AIS-B (n = 19)                     | <b>Intercept</b>          | <b>42·944</b> | <b>18·280</b>  | <b>23·895</b>   | <b>2·349</b>  | <b>0·027</b>     |
|                                    | Age                       | -20·461       | 30·066         | 15·745          | -0·681        | 0·506            |
|                                    | Time since Injury         | 35·974        | 14·371         | 73·246          | 2·503         | 0·015            |
|                                    | YEARDOI                   | -5·202        | 33·508         | 28·106          | -0·155        | 0·878            |
|                                    | Time since Injury*YEARDOI | -2·584        | 31·033         | 74·250          | -0·083        | 0·934            |
| AIS-C (n = 29)                     | <b>Intercept</b>          | <b>68·062</b> | <b>11·521</b>  | <b>38·208</b>   | <b>5·908</b>  | <b>&lt;0·001</b> |
|                                    | Age                       | -31·466       | 18·183         | 26·541          | -1·731        | 0·095            |
|                                    | <b>Time since Injury</b>  | <b>36·052</b> | <b>8·150</b>   | <b>131·775</b>  | <b>4·423</b>  | <b>&lt;0·001</b> |
|                                    | YEARDOI                   | -11·447       | 19·781         | 48·273          | -0·579        | 0·566            |
|                                    | Time since Injury*YEARDOI | 18·560        | 18·152         | 131·494         | 1·023         | 0·308            |
| AIS-D (n = 5)                      | <b>Intercept</b>          | <b>57·985</b> | <b>27·996</b>  | <b>1·696</b>    | <b>2·071</b>  | <b>0·197</b>     |
|                                    | Age                       | -10·554       | 45·048         | 1·544           | -0·234        | 0·842            |
|                                    | <b>Time since Injury</b>  | <b>54·457</b> | <b>10·507</b>  | <b>18·055</b>   | <b>5·183</b>  | <b>&lt;0·001</b> |
|                                    | YEARDOI                   | 45·324        | 44·281         | 1·971           | 1·024         | 0·415            |
|                                    | Time since Injury*YEARDOI | -50·905       | 25·596         | 17·727          | -1·989        | 0·062            |
| <b>Male paraplegic patients</b>    |                           |               |                |                 |               |                  |
| AIS-A (n = 105)                    | <b>Intercept</b>          | <b>52·247</b> | <b>2·249</b>   | <b>131·900</b>  | <b>23·229</b> | <b>&lt;0·001</b> |
|                                    | Age                       | -11·206       | 4·926          | 101·506         | -2·275        | 0·025            |
|                                    | <b>Time since Injury</b>  | <b>4·730</b>  | <b>1·394</b>   | <b>478·024</b>  | <b>3·394</b>  | <b>0·001</b>     |
|                                    | YEARDOI                   | 0·376         | 3·568          | 156·607         | 0·105         | 0·916            |
|                                    | Time since Injury*YEARDOI | -2·245        | 2·823          | 479·179         | -0·795        | 0·427            |
| AIS-B (n = 8)                      | <b>Intercept</b>          | <b>69·410</b> | <b>10·002</b>  | <b>9·152</b>    | <b>6·939</b>  | <b>&lt;0·001</b> |
|                                    | Age                       | 6·342         | 16·457         | 5·204           | 0·385         | 0·715            |
|                                    | Time since Injury         | 15·241        | 8·931          | 32·615          | 1·707         | 0·097            |
|                                    | YEARDOI                   | -14·440       | 12·625         | 15·931          | -1·144        | 0·270            |
|                                    | Time since Injury*YEARDOI | 46·875        | 15·350         | 33·383          | 3·054         | 0·004            |
| AIS-C (n = 12)                     | <b>Intercept</b>          | <b>80·461</b> | <b>12·674</b>  | <b>11·452</b>   | <b>6·348</b>  | <b>&lt;0·001</b> |
|                                    | Age                       | -39·956       | 20·886         | 9·073           | -1·913        | 0·088            |
|                                    | Time since Injury         | 12·631        | 6·720          | 45·730          | 1·880         | 0·067            |
|                                    | YEARDOI                   | -5·761        | 17·404         | 12·919          | -0·331        | 0·746            |
|                                    | Time since Injury*YEARDOI | 8·226         | 11·656         | 45·527          | 0·706         | 0·484            |
| <b>Male tetraplegic patients</b>   |                           |               |                |                 |               |                  |
| AIS-A (n = 254)                    | <b>Intercept</b>          | <b>19·923</b> | <b>2·212</b>   | <b>370·434</b>  | <b>9·008</b>  | <b>&lt;0·001</b> |
|                                    | Age                       | -9·389        | 3·739          | 260·094         | -2·511        | 0·013            |
|                                    | <b>Time since Injury</b>  | <b>13·296</b> | <b>1·692</b>   | <b>1094·515</b> | <b>7·860</b>  | <b>&lt;0·001</b> |
|                                    | YEARDOI                   | 0·980         | 3·312          | 455·177         | 0·296         | 0·768            |
|                                    | Time since Injury*YEARDOI | -3·899        | 3·124          | 1090·001        | -1·248        | 0·212            |
| AIS-B (n = 50)                     | <b>Intercept</b>          | <b>55·912</b> | <b>8·772</b>   | <b>78·899</b>   | <b>6·374</b>  | <b>&lt;0·001</b> |
|                                    | Age                       | -30·882       | 12·107         | 47·770          | -2·551        | 0·014            |
|                                    | <b>Time since Injury</b>  | <b>23·099</b> | <b>7·574</b>   | <b>220·015</b>  | <b>3·050</b>  | <b>0·003</b>     |
|                                    | YEARDOI                   | -15·440       | 13·467         | 98·978          | -1·147        | 0·254            |
|                                    | Time since Injury*YEARDOI | 12·064        | 13·812         | 219·579         | 0·874         | 0·383            |
| AIS-C (n = 106)                    | <b>Intercept</b>          | <b>46·755</b> | <b>6·416</b>   | <b>143·588</b>  | <b>7·287</b>  | <b>&lt;0·001</b> |
|                                    | Age                       | -6·499        | 8·855          | 104·395         | -0·734        | 0·465            |
|                                    | <b>Time since Injury</b>  | <b>41·567</b> | <b>4·821</b>   | <b>440·582</b>  | <b>8·622</b>  | <b>&lt;0·001</b> |
|                                    | YEARDOI                   | 9·198         | 9·649          | 184·149         | 0·953         | 0·342            |
|                                    | Time since Injury*YEARDOI | -9·498        | 9·388          | 441·370         | -1·012        | 0·312            |
| AIS-D (n = 23)                     | <b>Intercept</b>          | <b>57·386</b> | <b>9·904</b>   | <b>29·985</b>   | <b>5·795</b>  | <b>&lt;0·001</b> |
|                                    | Age                       | 4·259         | 15·182         | 20·289          | 0·281         | 0·782            |
|                                    | <b>Time since Injury</b>  | <b>35·681</b> | <b>7·763</b>   | <b>101·811</b>  | <b>4·597</b>  | <b>&lt;0·001</b> |
|                                    | YEARDOI                   | 29·203        | 20·105         | 40·125          | 1·453         | 0·154            |
|                                    | Time since Injury*YEARDOI | -23·775       | 21·030         | 104·144         | -1·131        | 0·261            |



**Additional File 3: Table S9. Sensitivity analysis: Surgical timing on total motor score** stratified by AIS grades. Patients were enrolled in the Sygen Trial. Note: In case the number of patients per group were too low ( $n < 3$ ), the model did not converge and thus, the results are not represented in the table.

| <i>Predictors</i>     | <b>AIS A</b>         |                  | <b>AIS C</b>        |                  | <b>AIS D</b>        |                  |
|-----------------------|----------------------|------------------|---------------------|------------------|---------------------|------------------|
|                       | <i>Estimates</i>     | <i>p</i>         | <i>Estimates</i>    | <i>p</i>         | <i>Estimates</i>    | <i>p</i>         |
| (Intercept)           | 47.34                | <b>&lt;0.001</b> | 40.44               | <b>&lt;0.001</b> | 50.96               | <b>&lt;0.001</b> |
| Age                   | -0.05                | 0.495            | -0.10               | 0.410            | -0.24               | 0.166            |
| Sex [Male]            | -0.84                | 0.733            | 2.40                | 0.498            | 8.09                | 0.327            |
| Time                  | 0.15                 | <b>&lt;0.001</b> | 0.42                | <b>&lt;0.001</b> | 0.28                | <b>&lt;0.001</b> |
| Plegia [tetra]        | -28.78               | <b>&lt;0.001</b> | -11.68              | 0.150            | -17.63              | 0.147            |
| ealy_vs_late [late]   | -0.48                | 0.812            | -6.81               | 0.410            | 3.51                | 0.525            |
| <b>Random Effects</b> |                      |                  |                     |                  |                     |                  |
| $\sigma^2$            | 20.65                |                  | 55.72               |                  | 47.36               |                  |
| $\tau_{00}$           | 116.07 <sub>ID</sub> |                  | 82.91 <sub>ID</sub> |                  | 44.48 <sub>ID</sub> |                  |
| ICC                   | 0.85                 |                  | 0.60                |                  | 0.48                |                  |
| N                     | 128 <sub>ID</sub>    |                  | 45 <sub>ID</sub>    |                  | 14 <sub>ID</sub>    |                  |
